# Supplementary material for: Isotope dilution-liquid chromatography-tandem mass spectrometry-based candidate reference measurement procedures for the quantification of total and free phenytoin in human serum and plasma
Source: publisher site journal article supplement (doi:10.1515/cclm-2024-0858), 2025-06-21
Supplement: Supplementary file 3 [file j_cclm-2024-0858_suppl_003.docx]

**Supplemental material 3**

**Isotope dilution-liquid chromatography-tandem mass spectrometry-based candidate reference measurement procedures for the quantification of total and free phenytoin in human serum and plasma**

**Short title:** An ID-LC-MS/MS candidate RMP for the quantitation of phenytoin

Tobias Schierschera, Linda Salzmanna, Neeraj Singhb, Manuel Seitzb, Janik Wilda, Carina Schäfera, Friederike Baulandc, Andrea Geistangerb, Lorenz Rischa, Christian Geletnekyb, Christoph Segera and Judith Taibonb*

aDr. Risch Ostschweiz AG, Lagerstrasse 30, 9470 Buchs, Switzerland

bRoche Diagnostics GmbH, Nonnenwald 2, 82377 Penzberg, Germany

cChrestos Concept GmbH & Co. KG, Girardestaße 1–5, 45131 Essen, Germany

***Corresponding author: Judith Taibon, PhD**, Nonnenwald 2, 82377 Penzberg, Germany, Phone: +49 8856 6012941, E-Mail: [judith.taibon@roche.com](mailto:judith.taibon@roche.com)

***Characterization of reference material by quantitative nuclear magnetic resonance (qNMR) measurements***

Quantitative nuclear magnetic resonance (qNMR) measurements were performed in six replicates using the International System of Units (SI units) traceable internal standard (ISTD) for the quantification of the absolute content of phenytoin.

The following formula was utilized to calculate the absolute content of phenytoin:

*Px*: Purity of the analyte as mass fraction

*Pstd*: Purity of the internal qNMR standard as mass fraction

*Ix*: Integral of the analyte

*Istd*: Integral of the internal standard

*Nx*: No. of analyte protons

*Nstd*: No. of internal qNMR standard protons

*Mx*: Molecular weight of the analyte

*Mstd*: Molecular weight of the qNMR internal standard

*mx*: Mass of analyte

*mstd*: Mass of qNMR internal standard

**For phenytoin:**

The following values are common to all the qNMR measurements:

Molecular Weight of Phenytoin = 252.2679 g/mol; Molecular weight of the qNMR internal standard ISTD (Methyl-3,5-dinitrobenzoate = 226.143 g/mol; Purity of the qNMR internal standard as mass fraction = 99.84 ± 0.17% (k = 2); *Number of Protons taken into account for the ISTD = 3 and for Phenytoin = 4; Integral of Phenytoin proton = 4*.

Procedure for sample preparation and processing parameter:

Phenytoin (Sigma; PHR1139; Lot Nr. LRAB7770) and Methyl-3,5-dinitrobenzoate (TraceCert qNMR standard traceable to NIST PS1; BCBW3152) was purchased from SigmaAldrich, Germany. 5mm NMR tubes were obtained from Euroisotop GmbH. Phenytoin (Table 1) and the qNMR standard (Table 1) were weighed together in a glass vial on an Ultra-microbalance (XPR6U), from Mettler Toledo. Pyridine-d5 (approx. 700 *µ*L) was added to the glass vial, and after a short vortexing, the solution was transferred to a 5 mm NMR tube. The single-pulse-1H{13C}NMR measurements were performed on a JEOL 600 MHz NMR spectrometer equipped with an ultra-cool probe head, which provides 4-5 times sensitivity enhancement compared to normal room-temperature probe heads. For Phenytoin, single-pulse-1H{13C}NMR was utilized for the quantitation (Figure 1; chemically equivalent aromatic protons ortho to the *sp3*-hybridised Carbon; *δ* = 7.85 ppm, 4H; Methyl-3,5-dinitrobenzoate as qNMR internal standard, CH3; Pyridine-d5 as solvent) with an inter-scan delay of 70 seconds. NMR measurements were performed at 298K/300 K utilizing 64k data points and the number of scans were limited to 64 with automatic receiver gain conditions. Processing was performed with an exponential window function (line broadening = 0.3 Hz), followed by manual phase and baseline corrections. Six individual experiments involving six individual weightings, yield a final absolute content value of 99.7 ± 0.2% (k=1) for phenytoin (Table 1 and Figure 2).

**Table 1**: qNMR calculation of the purity of Phenytoin; mass is given in milligrams (mg).

| **Phenytoin**  **source** | **Measurement No.** | **Mass of Phenytoin (mx)** | **Mass of qNMR ISTD weighed (mstd)** | **Integral of the qNMR ISTD (Istd)** | **Purity of Phenytoin**  **as mass fraction (Px) %** |
| --- | --- | --- | --- | --- | --- |
| Sigma | 1 | 4.4386 | 2.4324 | 1.8329 | 99.90 |
| Sigma | 2 | 3.8474 | 3.1139 | 2.7148 | 99.61 |
| Sigma | 3 | 6.7037 | 3.6952 | 1.8490 | 99.61 |
| Sigma | 4 | 4.8408 | 6.0607 | 4.2058 | 99.46 |
| Sigma | 5 | 4.8813 | 2.3987 | 1.6470 | 99.69 |
| Sigma | 6 | 5.8873 | 3.7048 | 2.1099 | 99.65 |


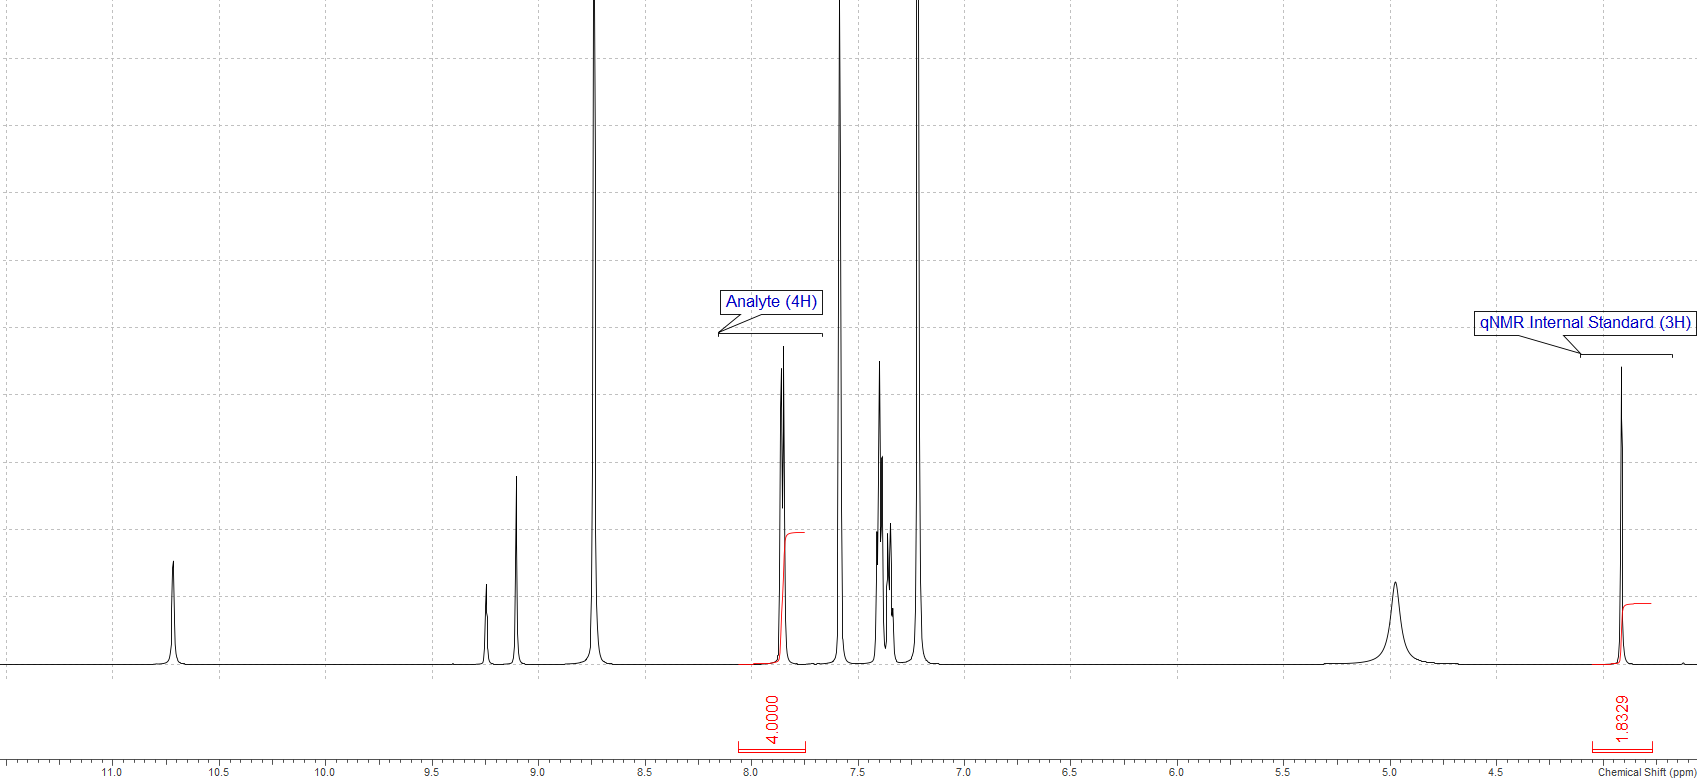


**Figure 1**: qNMR spectrum indicating the protons (in red) utilized for the quantification of Phenytoin


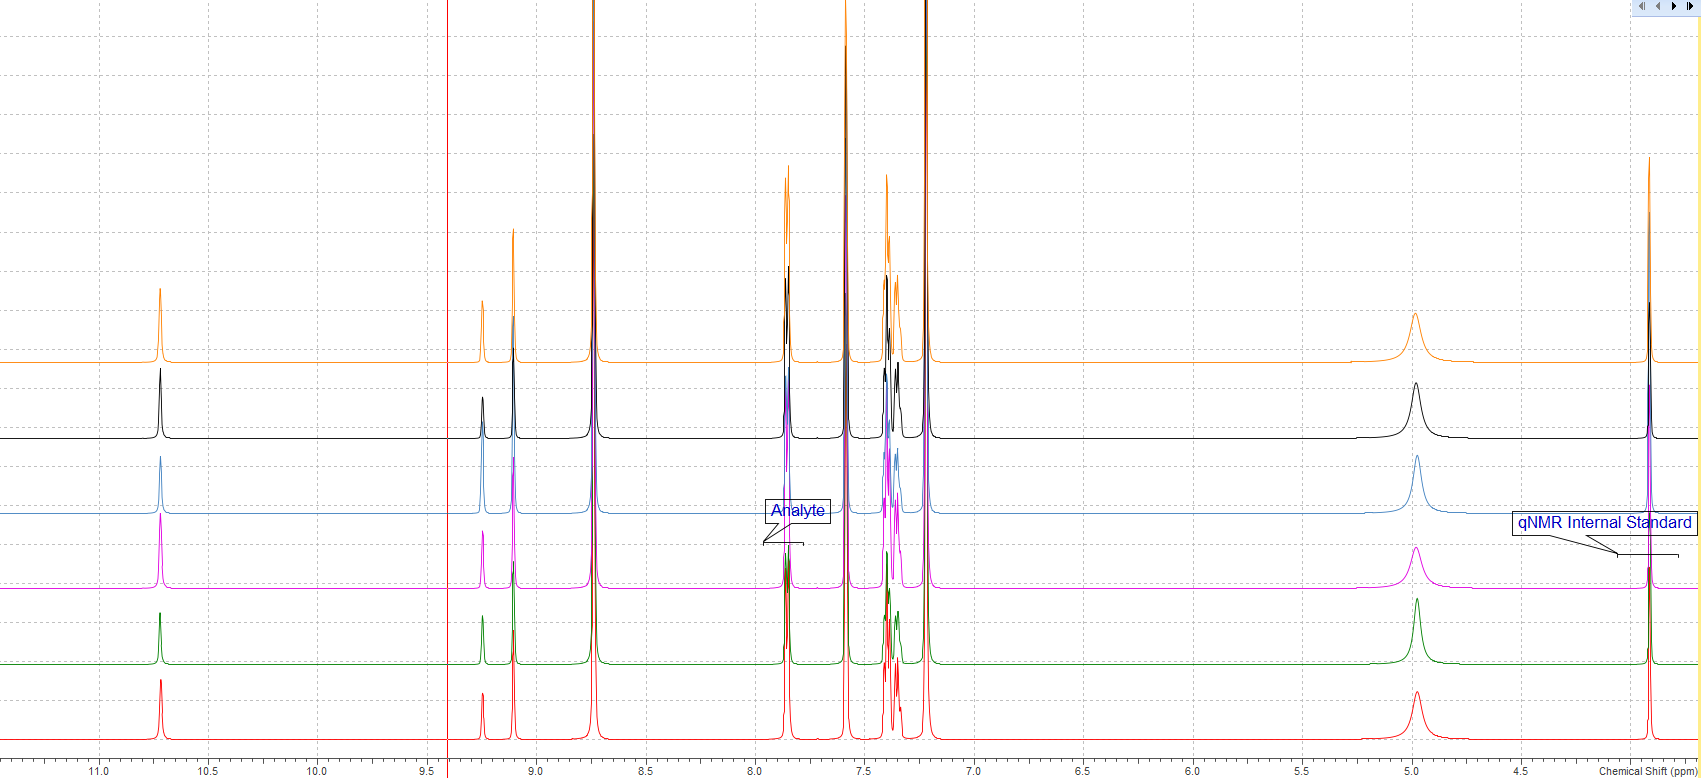


**Figure 2**: Overlay of the 6 qNMR spectra (Phenytoin) acquired under the afore-mentioned quantitative conditions.

**
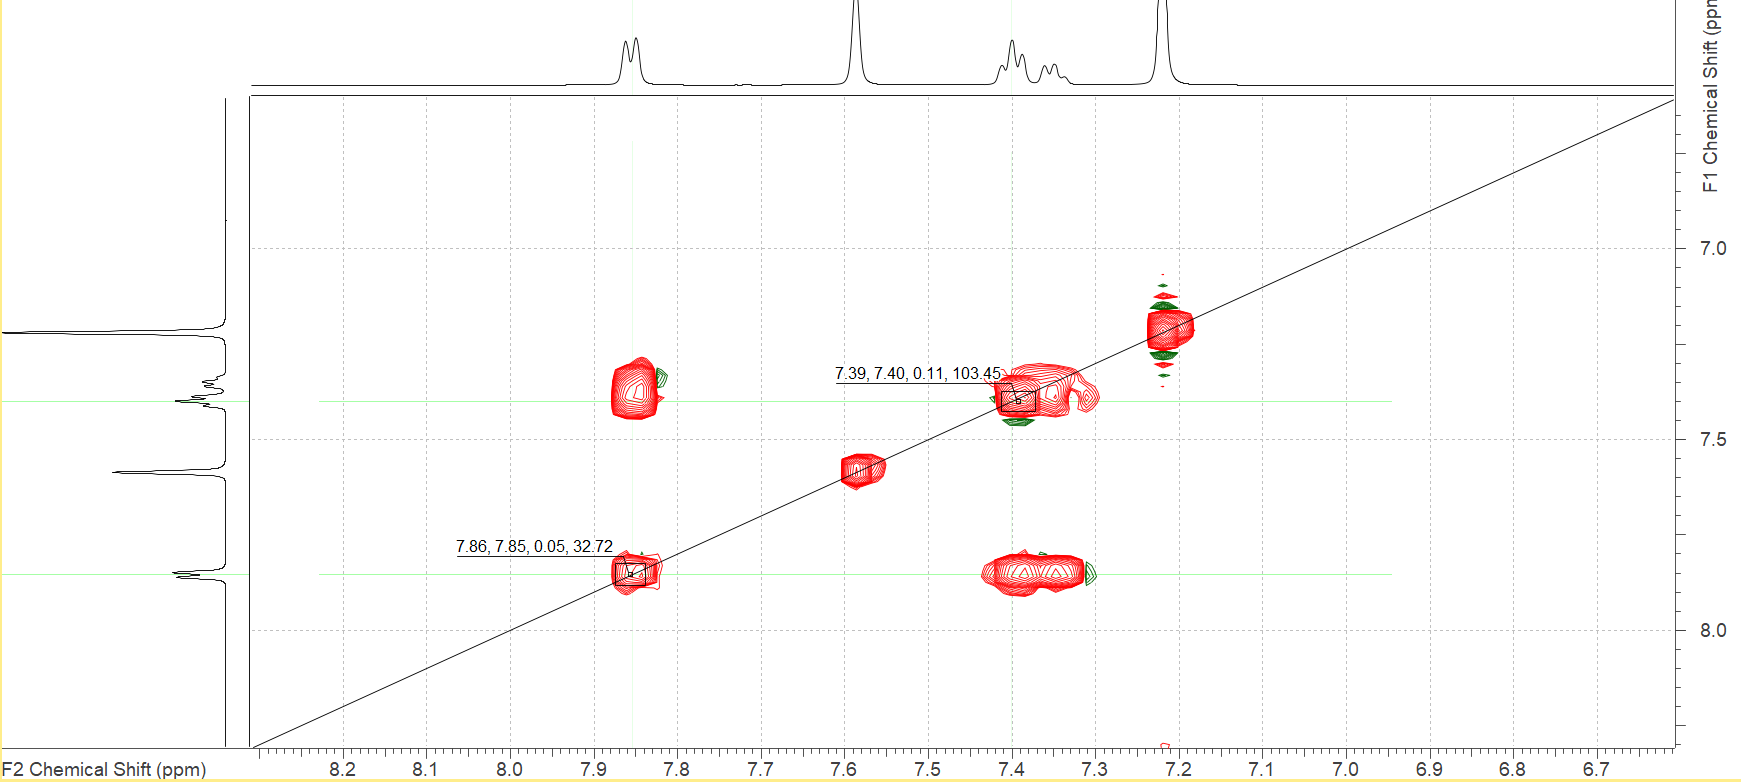
**

**Figure 3:** 2D-TOCSY spectrum of Phenytoin showing the coupling of the quantitative resonance.
